# Supplementary material for: Essential and distinct roles of the F-box and helicase domains of Fbh1 in DNA damage repair
Source: PubMed Central journal article supplement (PMC2294136; doi:10.1186/1471-2199-9-27), 2008-03-03

# WT strain

---

Control

MMS 0.001%

GFP fbh1 (WT)

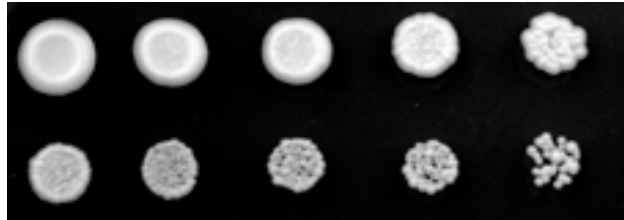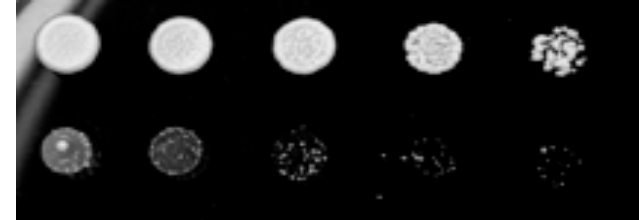

GFP fbh1-*hl*

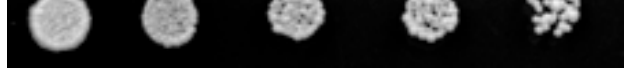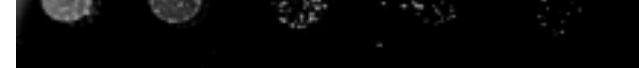

GFP fbh1 (WT)

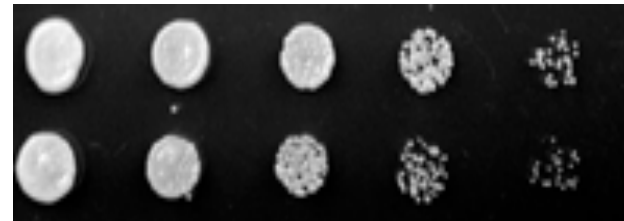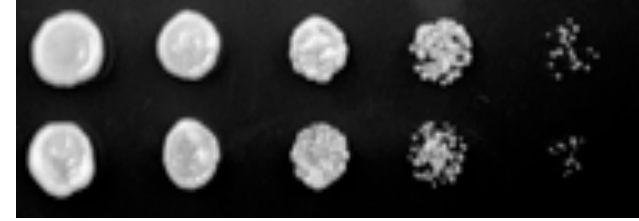

GFP fbh1-*fb*

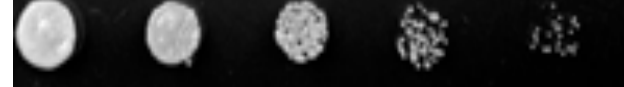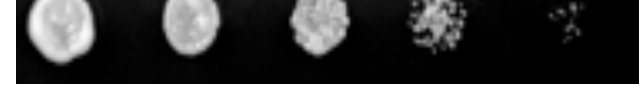

Supplement: 1471-2199-9-27-S1.pdf [file 1471-2199-9-27-S1.pdf]
