# Supplementary material for: Essential and distinct roles of the F-box and helicase domains of Fbh1 in DNA damage repair
Source: PubMed Central journal article supplement (PMC2294136; doi:10.1186/1471-2199-9-27), 2008-03-03

# GFP-F-box

---

control

+ MMS

GFP

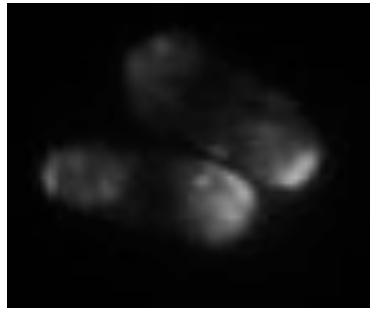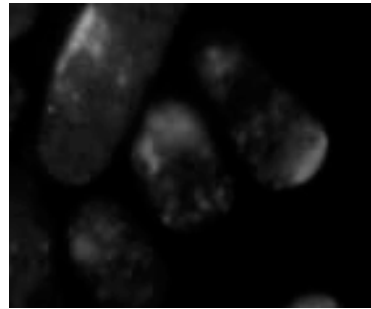

DAPI

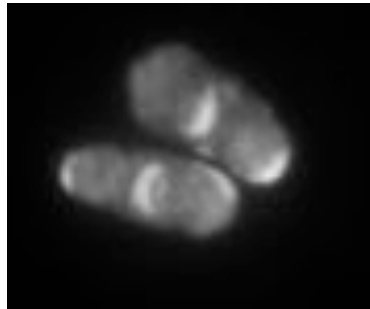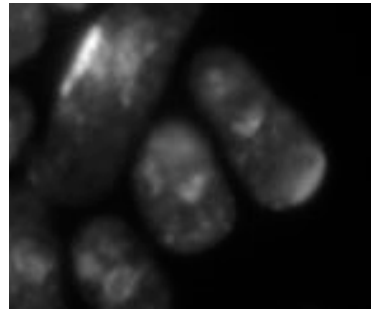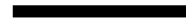

Supplement: 1471-2199-9-27-S2.pdf [file 1471-2199-9-27-S2.pdf]
